# Supplementary material
Source: PubMed Central journal article supplement (PMC5955052)
Supplement: AnnalsATS.201707-577OC_cohen_data_supplement.pdf [file AnnalsATS.201707-577OC_cohen_data_supplement.pdf]

**Echocardiogram in the Evaluation of Hemodynamically Stable Acute Pulmonary Embolism:  
National Practices and Clinical Outcomes**

David M. Cohen MD; Michael Winter MPH; Peter K. Lindenauer MD, MSc; Allan J. Walkey MD, MSc

**Online Data Supplement**

Contents:

**Table E1:** ICD-9-CM Coding key

**Table E2:** Procedure billing code key for Premier inpatient database

**Table E3:** Vasopressor pharmacy billing charge key for Premier inpatient database

**Table E4:** Thrombolytic pharmacy billing charge key for Premier inpatient database

**Table E5:** ICD-9-CM Coding key for bleeding complications

**Table E6:** Multivariate-adjusted factors associated with use of trans-thoracic echocardiogram in patients with hemodynamically stable, acute pulmonary embolism

**Table E7:** Outcomes associated with echocardiogram use: hospital-level exposure and patient-level admission to ICU or step-down

**Table E8:** Outcomes associated with composite exposure consisting of use of trans-thoracic echocardiogram, cardiac troponin, or beta-natriuretic peptide within four days of hospital admission: hospital-level exposure and patient-level outcomes

**Table E9:** Outcomes associated with trans-thoracic echocardiogram use on hospital day 0 or day 1: hospital-level exposure and patient-level outcomes

**Table E10:** Outcomes associated with trans-thoracic echocardiogram use on hospital day 0 or day 1: patient-level exposure and patient-level outcomes

**Table E11:** Association between trans-thoracic echocardiogram use on hospital day 0 or 1 and ICU admission on/after hospital day 2: hospital-level exposure and patient-level outcomes

**Table E1:** ICD-9-CM Coding key

| <b>Condition</b>            | <b>ICD-9-CM Codes</b>                                                                                                                                    |
|-----------------------------|----------------------------------------------------------------------------------------------------------------------------------------------------------|
| <b>Inclusion Criteria:</b>  | <b>Present on admission (POA)</b>                                                                                                                        |
| Acute Pulmonary Embolism    | 415.1, 415.11, 415.13, 415.19, 673.2x                                                                                                                    |
|                             |                                                                                                                                                          |
| <b>Exclusion Criteria:</b>  | <b>Present on admission (POA)</b>                                                                                                                        |
| Shock                       | 785.5, 785.50, 785.51, 785.52, 785.59                                                                                                                    |
| Hypotension                 | 458.0, 458.8, 458.9, 796.3                                                                                                                               |
| Acute Blood Loss Anemia     | 285.1                                                                                                                                                    |
| Hemorrhagic Stroke          | 430, 431, 432.00, 432.1, 432.9                                                                                                                           |
| Gastrointestinal Bleed      | 530.82, 531.0, 531.1, 531.2, 532.0, 532.1, 532.2, 533.0, 533.1, 533.2, 534.0, 534.1, 534.2, 535, 537, 562.02, 562.12, 569.3, 569.85, 578.0, 578.1, 578.9 |
|                             |                                                                                                                                                          |
| <b>Acute Organ Failures</b> |                                                                                                                                                          |
| Hematological Failure       | 287.3, 287.4, 287.5, 286.9, 286.6, 286.2                                                                                                                 |
| Hepatic Failure             | 570, 572.2, 573.3                                                                                                                                        |
| Metabolic Failure           | 276.2                                                                                                                                                    |
| Neurological Failure        | 348.3, 293, 348.1, 780.01, 780.09, 891.4                                                                                                                 |
| Renal Failure               | 584                                                                                                                                                      |
| Respiratory Failure         | 518.81, 518.82, 518.84, 786.09, 799.1                                                                                                                    |
| Electrolyte Abnormality     | 276x, 275.2                                                                                                                                              |
| Myocardial Infarction       | 412                                                                                                                                                      |
|                             |                                                                                                                                                          |
| <b>Comorbidities:</b>       |                                                                                                                                                          |
| Congestive heart failure    | 425, 428.32, 428.22, 404.01, 404.03, 404.11, 404.13, 404.91, 404.93, 402.01, 402.11, 402.91, 398.91                                                      |
| Atrial Fibrillation         | 427.3                                                                                                                                                    |

|                             |                                                                |
|-----------------------------|----------------------------------------------------------------|
| COPD                        | 491, 492                                                       |
| Chronic Hypertension        | 401, 402, 403, 404, 405                                        |
| Diabetes                    | 250                                                            |
| Obesity                     | 278                                                            |
| Coronary artery disease     | 412                                                            |
| Ischemic Stroke             | 433, 434, 436                                                  |
| Solid Tumor                 | 14, 15, 16, 170, 171, 172, 174, 175, 179, 18, 190, 191         |
| Lymphoma                    | 200, 201, 202.0, 202.1, 202.2, 202.3, 202.5, 203, 238.6, 273.3 |
| Metastatic Cancer           | 196, 197, 198, 199.0, 199.1, 209.7, 789.51                     |
| Peripheral Vascular Disease | 440.2, 440.3, 443.9                                            |
| Rheumatological Disease     | 710.0, 710.1, 710.4, 714.0, 714.1, 714.2, 714.8                |
| Dementia                    | 280                                                            |
| Hemiplegia                  | 342                                                            |
| Paralysis                   | 344.0, 344.1, 344.2, 344.3, 344.4, 344.5, 344.8, 344.9         |

*POA* present on admission, *COPD* chronic obstructive pulmonary disease

**Table E2:** Procedure billing code key for Premier inpatient database

| <b>Charge Description</b>                          |
|----------------------------------------------------|
| <b><i>Echocardiogram Use</i></b>                   |
| ECHO COLOR FLOW VELOCITY MAPPING                   |
| ECHO DOPPLER LIMITED                               |
| PF ECHO DOPPLER                                    |
| ECHO 2D W/M-MODE & COLOR FLOW                      |
| PF ECHO COLOR FLOW VELOCITY MAPPING                |
| ECHO 2D W/ OR W/O M-MODE PORTABLE                  |
| PF ECHO DOPPLER LIMITED                            |
| ECHO 2D W/ OR W/O M-MODE LIMITED                   |
| PF ECHO 2D W/ OR W/O M-MODE LIMITED                |
| ECHO DOPPLER                                       |
| PF ECHO 2D W/ OR W/O M-MODE COMPLETE W/ COLOR FLOW |
| PF ECHO 2D W/ OR W/O M-MODE COMPLET W/O COLOR FLOW |
| ECHO DOPPLER & COLOR FLOW                          |
| ECHO STAT FEE                                      |
| ECHO CONGENITAL ANOMALY LIMITED                    |
| ECHO 2D W/M-MODE & DOPPLER                         |
| PF ECHO DOPPLER PORTABLE                           |
| ECHO 2D W/M-MODE PED                               |
| ECHO DOPPLER PORTABLE                              |
| ECHO PORTABLE FEE                                  |
| PF ECHO CONGENITAL ANOMALY LIMITED                 |
| ECHO 2D W/ OR W/O M-MODE COMPLETE W/O COLOR FLOW   |

|                                                   |
|---------------------------------------------------|
| ECHO CONGENITAL ANOMALY COMPLETE                  |
| ECHO 2D W/ OR W/O M-MODE COMPLETE W/ COLOR FLOW   |
| PF ECHO CONGENITAL ANOMALY COMPLETE               |
|                                                   |
| <b><i>Cardiac Troponin Lab</i></b>                |
| PF TROPONIN QN                                    |
| TROPONIN QUAL                                     |
| TROPONIN QN                                       |
| PF TROPONIN QUAL                                  |
| PF TROPONIN QN                                    |
|                                                   |
| <b><i>Beta-natriuretic peptide (BNP) Lab</i></b>  |
| B-TYPE NATRIURETIC PEPTIDE                        |
| PF B-TYPE NATRIURETIC PEPTIDE                     |
|                                                   |
| <b><i>Intensive Care Unit (ICU) Admission</i></b> |
| PF CRITICAL CARE ADDL 30 MIN                      |
| PF CRITICAL CARE 1ST HR                           |
| OBSERVATION ICU/CCU ADDL HR                       |
| R&B MICU                                          |
| OBSERVATION ICU/CCU FLAT RATE                     |
| R&B ICU                                           |
| R&B MICU ISOLATION                                |
| OBSERVATION ICU 7-11 HRS                          |
| OBSERVATION ICU/CCU PER HR                        |
| OBSERVATION ICU 12-18 HRS                         |
| PATIENT CARE ICU W/MECHANICAL VENT 24 HRS OR LESS |
| OBSERVATION ICU PARTIAL DAY                       |

|                                        |
|----------------------------------------|
| OBSERVATION ICU FLAT RATE              |
| R&B CICU/CCU ISOLATION (CORONARY CARE) |
| R&B CICU/CCU (CORONARY CARE)           |
| R&B ICU ISOLATION                      |
| R&B CVICU                              |
| OBSERVATION ICU 0-6 HRS                |
| R&B SICU                               |
| R&B SICU ISOLATION                     |
| OBSERVATION ICU PER HR                 |
| OBSERVATION ICU PARTIAL STAY PER HR    |
| OBSERVATION ICU/CCU ADDL 30 MIN        |
| OBSERVATION ICU/CCU PER 30 MIN         |
| R&B CVICU ISOLATION                    |
|                                        |
| <b><i>Step-down Admission</i></b>      |
| R&B STEP DOWN CICU/CCU DELUXE          |
| R&B STEP DOWN CVICU ISOLATION          |
| R&B STEP DOWN CICU/CCU SEMI PRIVATE    |
| R&B STEP DOWN SICU PRIVATE             |
| R&B STEP DOWN CVICU SEMI PRIVATE       |
| R&B STEP DOWN CVICU PRIVATE            |
| R&B STEP DOWN MICU ISOLATION           |
| R&B STEP DOWN MICU DELUXE              |
| R&B STEP DOWN SICU DELUXE              |
| R&B STEP DOWN CICU/CCU PRIVATE         |
| R&B STEP DOWN SEMI PRIVATE             |
| R&B STEP DOWN MICU SEMI PRIVATE        |
| R&B STEP DOWN CICU/CCU ISOLATION       |
| R&B STEP DOWN SICU ISOLATION           |

|                                 |
|---------------------------------|
| R&B STEP DOWN CVICU DELUXE      |
| R&B STEP DOWN SICU SEMI PRIVATE |
| R&B STEP DOWN MICU PRIVATE      |

**Table E3:** Vasopressor pharmacy billing charge key for Premier inpatient database

| <b>List of Vasopressors/Inotropes *</b>     |
|---------------------------------------------|
| DOBUTAMINE MISC                             |
| DOBUTAMINE, DOBUTREX IVPB 1GM               |
| DOBUTAMINE, DOBUTREX IVPB 250MG             |
| DOBUTAMINE, DOBUTREX IVPB 500MG             |
| DOBUTAMINE, DOBUTREX VL 250MG               |
| DOPAMINE IVPB 1600MG 500ML                  |
| DOPAMINE IVPB 200MG 250ML                   |
| DOPAMINE IVPB 400MG 250ML                   |
| DOPAMINE IVPB 400MG 500ML                   |
| DOPAMINE IVPB 800MG 250ML                   |
| DOPAMINE IVPB 800MG 500ML                   |
| DOPAMINE MISC                               |
| DOPAMINE, INTROPIN INJ 160MG/ML 5ML         |
| DOPAMINE, INTROPIN INJ 40MG                 |
| DOPAMINE, INTROPIN INJ 40MG/ML 10ML         |
| DOPAMINE, INTROPIN INJ 40MG/ML 20ML         |
| DOPAMINE, INTROPIN INJ 40MG/ML 5ML          |
| DOPAMINE, INTROPIN INJ 80MG/ML 10ML         |
| DOPAMINE, INTROPIN VL 160MG/ML 5ML          |
| DOPAMINE, INTROPIN VL 40MG/ML 10ML          |
| DOPAMINE, INTROPIN VL 40MG/ML 5ML           |
| DOPAMINE, INTROPIN VL 80MG/ML 20ML          |
| DOPAMINE, INTROPIN VL 80MG/ML 5ML           |
| MILRINONE LAC MISC                          |
| MILRINONE LAC, PRIMACOR INJ 1MG/ML 5ML      |
| MILRINONE LAC, PRIMACOR IVPB 0.2MG/ML 100ML |
| MILRINONE LAC, PRIMACOR IVPB 1MG/ML 100ML   |
| MILRINONE LAC, PRIMACOR VL 1MG/ML 10ML      |
| MILRINONE LAC, PRIMACOR VL 1MG/ML 20ML      |
| NOREPINEPHRINE MISC                         |



|                                              |
|----------------------------------------------|
| NOREPINEPHRINE, LEVOPHED AMP 1MG/ML 2ML      |
| NOREPINEPHRINE, LEVOPHED AMP 1MG/ML 4ML      |
| PHENYLEPH MISC                               |
| PHENYLEPH, NEO-SYNEPH AMP 1% 10MG/ML 1ML     |
| PHENYLEPH, NEO-SYNEPH AMP 1% 10MG/ML 5ML     |
| VASOPRESSIN MISC                             |
| VASOPRESSIN, PITRESSIN AMP 20U/ML 0.5ML      |
| VASOPRESSIN, PITRESSIN AMP 20U/ML 1ML        |
| VASOPRESSIN, PITRESSIN AMP 20U/ML 5ML        |
| VASOPRESSIN, PITRESSIN TAN/OIL AMP 5U/ML 1ML |

\* We examined the correlation between use of a vasopressor on day 0-1 and ICD-9 codes for hypotension/shock present on admission (POA). Among excluded patients who received a vasopressor on admission (day 0-1), 55% had ICD-9 codes identifying hypotension or shock POA. Conversely, among excluded patients who had ICD-9 codes identifying hypotension or shock POA, 6% received a vasopressor on admission.

**Table E4:** Thrombolytic pharmacy billing charge key for Premier inpatient database

| <b>Thrombolytic Pharmacy Charge Description</b>   |
|---------------------------------------------------|
| <b><i>Systemic Thrombolytics</i></b>              |
| ALTEPLASE MISC                                    |
| ALTEPLASE, ACTIVASE VL 100MG                      |
| ALTEPLASE, ACTIVASE VL 20MG                       |
| ALTEPLASE, ACTIVASE VL 50MG                       |
| ANISTREPLASE MISC                                 |
| ANISTREPLASE, EMINASE VL 30U                      |
| RETEPLASE MISC                                    |
| RETEPLASE, RETAVASE 1 VIAL 10.8IU(18.8MG) 1/2 KIT |
| RETEPLASE, RETAVASE 2 VIAL 10.8IU(18.8MG) KIT     |
| STREPTOKINASE MISC                                |
| STREPTOKINASE, KABIKINASE VL 600,000IU            |
| STREPTOKINASE, STREPTASE VL 1,500,000IU           |
| STREPTOKINASE, STREPTASE VL 250,000IU             |
| STREPTOKINASE, STREPTASE VL 750,000IU             |
| TENECTEPLASE MISC                                 |
| TENECTEPLASE, TNKASE VL 50MG                      |
| UROKINASE MISC                                    |
| UROKINASE, ABBOKINASE VL 250,000U                 |
| UROKINASE, ABBOKINASE VL 9,000U                   |
| <b><i>Line/Chest Tube clearance *</i></b>         |
| ALTEPLASE, ACTIVASE VL 1MG                        |
| UROKINASE, ABBOKINASE VL 2,500U                   |
| UROKINASE, ABBOKINASE VL 5,000U                   |

\* Pharmacy charges that were consistent with catheter clearance (i.e., 1mg alteplase) were not coded as systemic thrombolytic. For thrombolytic pharmacy charges lacking detail which would allow differentiation of systemic vs. local use (e.g., alteplase misc), the thrombolytic was classified as systemic

**Table E5: ICD-9-CM Coding Key for Bleeding Complications**

| <b>ICD-9 Coding Schema for Identifying Bleeding</b>                    |                                                                                                      |
|------------------------------------------------------------------------|------------------------------------------------------------------------------------------------------|
| <b>Originally Validated ICD-9-CM Codes (Arnason <i>et al</i> [23])</b> |                                                                                                      |
| Code                                                                   | Description                                                                                          |
| 423.00                                                                 | Hemopericardium                                                                                      |
| 430.00                                                                 | Subarachnoid hemorrhage                                                                              |
| 431.00                                                                 | Intracerebral hemorrhage                                                                             |
| 432.00                                                                 | Nontraumatic extradural hemorrhage                                                                   |
| 432.1                                                                  | Subdural hemorrhage                                                                                  |
| 432.9                                                                  | Unspecified intracranial hemorrhage                                                                  |
| 455.20                                                                 | Internal hemorrhoids with other complication                                                         |
| 455.50                                                                 | External hemorrhoids with other complication                                                         |
| 455.80                                                                 | Unspecified hemorrhoids with other complication                                                      |
| 459.00                                                                 | Hemorrhage, unspecified                                                                              |
| 456.00                                                                 | Esophageal varices with bleeding                                                                     |
| 456.20                                                                 | Esophageal varices in diseases classified elsewhere                                                  |
| 530.70                                                                 | Gastroesophageal laceration-hemorrhage syndrome                                                      |
| 530.80                                                                 | Other specified disorders of esophagus                                                               |
| 531.00                                                                 | Acute gastric ulcer with hemorrhage                                                                  |
| 531.01                                                                 | Acute gastric ulcer with hemorrhage, with obstruction                                                |
| 531.20                                                                 | Acute gastric ulcer with hemorrhage and perforation, without mention of obstruction                  |
| 531.21                                                                 | Acute gastric ulcer with hemorrhage and perforation, with obstruction                                |
| 531.40                                                                 | Chronic or unspecified gastric ulcer with hemorrhage, without mention of obstruction                 |
| 531.41                                                                 | Chronic or unspecified gastric ulcer with hemorrhage, with obstruction                               |
| 531.60                                                                 | Chronic or unspecified gastric ulcer with hemorrhage and perforation, without mention of obstruction |
| 531.61                                                                 | Chronic or unspecified gastric ulcer with hemorrhage and perforation, with obstruction               |
| 532.00                                                                 | Acute duodenal ulcer with hemorrhage                                                                 |
| 532.01                                                                 | Acute duodenal ulcer with hemorrhage, with obstruction                                               |
| 532.20                                                                 | Acute duodenal ulcer with hemorrhage and perforation, without mention of obstruction                 |

|        |                                                                                                           |
|--------|-----------------------------------------------------------------------------------------------------------|
| 532.21 | Acute duodenal ulcer with hemorrhage and perforation, with obstruction                                    |
| 532.40 | Chronic or unspecified duodenal ulcer with hemorrhage, without mention of obstruction                     |
| 532.41 | Chronic or unspecified duodenal ulcer with hemorrhage, with obstruction                                   |
| 532.60 | Chronic or unspecified duodenal ulcer with hemorrhage and perforation, without mention of obstruction     |
| 532.61 | Chronic or unspecified duodenal ulcer with hemorrhage and perforation, with obstruction                   |
| 533.00 | Acute peptic ulcer of unspecified site with hemorrhage                                                    |
| 533.01 | Acute peptic ulcer of unspecified site with hemorrhage, with obstruction                                  |
| 533.20 | Acute peptic ulcer of unspecified site with hemorrhage and perforation                                    |
| 533.21 | Acute peptic ulcer of unspecified site with hemorrhage and perforation, with obstruction                  |
| 533.40 | Chronic or unspecified peptic ulcer of unspecified site with hemorrhage                                   |
| 533.41 | Chronic or unspecified peptic ulcer of unspecified site with hemorrhage, with obstruction                 |
| 533.60 | Chronic or unspecified peptic ulcer of unspecified site with hemorrhage and perforation                   |
| 533.61 | Chronic or unspecified peptic ulcer of unspecified site with hemorrhage and perforation, with obstruction |
| 534.00 | Acute gastrojejunal ulcer with hemorrhage                                                                 |
| 534.01 | Acute gastrojejunal ulcer, with hemorrhage, with obstruction                                              |
| 534.20 | Acute gastrojejunal ulcer with hemorrhage and perforation                                                 |
| 534.21 | Acute gastrojejunal ulcer with hemorrhage and perforation, with obstruction                               |
| 534.40 | Chronic or unspecified gastrojejunal ulcer with hemorrhage                                                |
| 534.41 | Chronic or unspecified gastrojejunal ulcer, with hemorrhage, with obstruction                             |
| 534.60 | Chronic or unspecified gastrojejunal ulcer with hemorrhage and perforation                                |
| 534.61 | Chronic or unspecified gastrojejunal ulcer with hemorrhage and perforation, with obstruction              |
| 535.01 | Acute gastritis, with hemorrhage                                                                          |
| 535.11 | Atrophic gastritis, with hemorrhage                                                                       |
| 535.21 | Gastric mucosal hypertrophy, with hemorrhage                                                              |
| 535.31 | Alcoholic gastritis, with hemorrhage                                                                      |
| 535.41 | Other specified gastritis, with hemorrhage                                                                |
| 535.51 | Unspecified gastritis and gastroduodenitis, with hemorrhage                                               |
| 535.61 | Duodenitis, with hemorrhage                                                                               |
| 537.80 | Other specified disorders of stomach and duodenum                                                         |
| 562.02 | Diverticulosis of small intestine with hemorrhage                                                         |

|                                  |                                                     |
|----------------------------------|-----------------------------------------------------|
| 562.03                           | Diverticulitis of small intestine with hemorrhage   |
| 562.12                           | Diverticulosis of colon with hemorrhage             |
| 562.13                           | Diverticulitis of colon with hemorrhage             |
| 568.81                           | Hemoperitoneum (nontraumatic)                       |
| 569.30                           | Hemorrhage of rectum and anus                       |
| 569.85                           | Angiodysplasia of intestine with hemorrhage         |
| 578.00                           | Hematemesis                                         |
| 578.10                           | Blood in stool                                      |
| 578.90                           | Hemorrhage of gastrointestinal tract, unspecified   |
| 593.81                           | Vascular disorders of kidney                        |
| 599.70                           | Hematuria                                           |
| 623.80                           | Other specified noninflammatory disorders of vagina |
| 626.20                           | Excessive or frequent menstruation                  |
| 626.60                           | Metrorrhagia                                        |
| 719.10                           | Hemarthrosis, unspecified                           |
| 719.11                           | Hemarthrosis, shoulder                              |
| 719.12                           | Hemarthrosis, upper arm                             |
| 719.13                           | Hemarthrosis, forearm                               |
| 719.14                           | Hemarthrosis, hand                                  |
| 719.15                           | Hemarthrosis, pelvic region and thigh               |
| 719.16                           | Hemarthrosis, lower leg                             |
| 719.17                           | Hemarthrosis, ankle and foot                        |
| 719.18                           | Hemarthrosis, other specified sites                 |
| 784.70                           | Epistaxis                                           |
| 784.80                           | Hemorrhage from throat                              |
| 786.30                           | Hemoptysis                                          |
| <b>Additional ICD-9-CM Codes</b> |                                                     |
| 997.02                           | Iatrogenic cerebrovascular infarction or hemorrhage |
| 285.1                            | Acute posthemorrhagic anemia                        |
| 530.82                           | Esophageal hemorrhage                               |

**Table E6.** Multivariate-adjusted factors associated with use of trans-thoracic echocardiogram in patients with hemodynamically stable, acute pulmonary embolism (N=64,037)

| Characteristic                  | Odds Ratio | 95 % CI |      | p-value * |
|---------------------------------|------------|---------|------|-----------|
| <b>Demographics</b>             |            |         |      |           |
| Age (per 10-year increase)      | 1.04       | 1.02    | 1.05 | < 0.01    |
| Race/ethnicity                  |            |         |      |           |
| White                           | REF        |         |      |           |
| Black                           | 1.02       | 0.96    | 1.07 |           |
| Hispanic                        | 0.86       | 0.77    | 0.96 | 0.03      |
| Other                           | 1.03       | 0.96    | 1.10 |           |
| Female sex                      | 0.90       | 0.87    | 0.94 | < 0.01    |
| Primary insurance payer         |            |         |      |           |
| Medicare                        | REF        |         |      |           |
| Medicaid                        | 0.94       | 0.87    | 1.01 |           |
| Other                           | 1.05       | 0.95    | 1.15 | < 0.01    |
| Private insurance               | 1.16       | 1.10    | 1.21 |           |
| Self-Pay                        | 1.03       | 0.94    | 1.13 |           |
| <b>Hospital characteristics</b> |            |         |      |           |
| # beds (per 100-bed increase)   | 1.04       | 1.00    | 1.07 | 0.04      |
| Location                        |            |         |      |           |
| Rural                           | REF        |         |      |           |
| Urban                           | 1.15       | 0.96    | 1.39 | 0.14      |
| Teaching hospital               | 0.88       | 0.74    | 1.05 | 0.16      |
| Geographic area                 |            |         |      |           |
| South                           | REF        |         |      |           |
| Midwest                         | 1.30       | 1.08    | 1.55 |           |
| Northeast                       | 1.98       | 1.61    | 2.44 | < 0.01    |
| West                            | 1.21       | 1.00    | 1.47 |           |
| <b>Comorbidities †</b>          |            |         |      |           |
| Congestive heart failure        | 1.53       | 1.41    | 1.65 | < 0.01    |
| Atrial fibrillation             | 1.40       | 1.32    | 1.48 | < 0.01    |
| COPD                            | 0.95       | 0.88    | 1.02 | 0.15      |
| Chronic hypertension            | 1.11       | 1.07    | 1.15 | < 0.01    |

|                                      |      |      |      |        |
|--------------------------------------|------|------|------|--------|
| Diabetes                             | 1.07 | 1.02 | 1.12 | < 0.01 |
| Obesity                              | 1.49 | 1.42 | 1.56 | < 0.01 |
| Coronary artery disease              | 0.88 | 0.66 | 1.18 | 0.40   |
| Ischemic stroke                      | 1.25 | 1.03 | 1.52 | 0.02   |
| Solid tumor                          | 0.75 | 0.70 | 0.80 | < 0.01 |
| Lymphoma                             | 0.92 | 0.75 | 1.12 | 0.39   |
| Metastatic cancer                    | 0.78 | 0.72 | 0.84 | < 0.01 |
| Peripheral vascular disease          | 1.01 | 0.91 | 1.11 | 0.91   |
| Rheumatologic disease                | 1.02 | 0.92 | 1.13 | 0.67   |
| Dementia                             | 1.09 | 1.00 | 1.18 | 0.05   |
| Hemiplegia                           | 1.02 | 0.70 | 1.49 | 0.90   |
| Paralysis                            | 0.84 | 0.65 | 1.10 | 0.20   |
| <b>Acute organ failures †</b>        |      |      |      |        |
| Respiratory failure                  | 1.56 | 1.46 | 1.67 | < 0.01 |
| Renal failure                        | 1.49 | 1.38 | 1.61 | < 0.01 |
| Neurological failure                 | 1.06 | 0.90 | 1.26 | 0.47   |
| Hematological failure                | 1.23 | 1.13 | 1.34 | < 0.01 |
| Hepatic failure                      | 1.73 | 1.18 | 2.54 | 0.01   |
| Metabolic failure                    | 1.27 | 1.06 | 1.51 | 0.01   |
| Electrolyte abnormalities            | 1.10 | 1.04 | 1.15 | < 0.01 |
| Acute myocardial infarction          | 2.06 | 1.74 | 2.45 | < 0.01 |
| <b>Attending physician specialty</b> |      |      |      |        |
| Internal medicine                    | REF  |      |      |        |
| Cardiology                           | 1.59 | 1.44 | 1.75 |        |
| Medical oncology                     | 0.61 | 0.55 | 0.68 |        |
| Other                                | 0.96 | 0.92 | 1.01 | <0.01  |
| Pulmonary-Critical Care              | 1.11 | 1.02 | 1.20 |        |
| Surgery                              | 0.71 | 0.60 | 0.83 |        |
| <b>Year of hospitalization</b>       |      |      |      |        |
| 2008                                 | REF  |      |      |        |
| 2009                                 | 0.93 | 0.88 | 0.97 | 0.02   |
| 2010                                 | 0.96 | 0.91 | 1.00 |        |
| 2011                                 | 0.96 | 0.91 | 1.01 |        |

*COPD* chronic obstructive pulmonary disease. <sup>a</sup> From hierarchical regression models accounting for demographics, comorbidities, acute organ failures, and hospital characteristics. † Present on hospital admission

Sensitivity Analyses:

**Table E7.** Outcomes associated with trans-thoracic echocardiogram use: hospital-level exposure and patient-level ICU or step-down admission (N=64,037)

| Outcome                           | Hospital echocardiogram rate for pulmonary embolism |                  |                  |                  | p-value* |
|-----------------------------------|-----------------------------------------------------|------------------|------------------|------------------|----------|
|                                   | Quartile 1                                          | Quartile 2       | Quartile 3       | Quartile 4       |          |
|                                   | 0-33%                                               | 33-42%           | 42-52%           | 52-89%           |          |
| ICU admission (OR, 95% CI)        | Ref                                                 | 0.86 (0.66-1.11) | 1.19 (0.91-1.55) | 1.57 (1.18-2.07) | < 0.01   |
| ICU <u>or</u> step-down admission | Ref                                                 | 0.76 (0.55-1.04) | 1.21 (0.88-1.66) | 1.68 (1.20-2.36) | < 0.01   |

\* From hierarchical regression models accounting for demographics, comorbidities, acute organ failures, and hospital characteristics



**Table E8.** Outcomes associated with composite exposure consisting of use of trans-thoracic echocardiogram, cardiac troponin, or beta-natriuretic peptide within four days of hospital admission: hospital-level exposure and patient-level outcomes (N=64,022)

| Outcome                     | Hospital RV-strain workup rate for PE |                  |                  |                  | p-value* |
|-----------------------------|---------------------------------------|------------------|------------------|------------------|----------|
|                             | Quartile 1                            | Quartile 2       | Quartile 3       | Quartile 4       |          |
|                             | 0-33%                                 | 33-42%           | 42-52%           | 52-89%           |          |
| Mortality (OR, 95% CI)      | Ref                                   | 0.93 (0.74-1.16) | 0.91 (0.73-1.13) | 0.82 (0.65-1.04) | 0.42     |
| ICU admission               | Ref                                   | 1.00 (0.76-1.30) | 1.19 (0.91-1.55) | 1.32 (1.00-1.73) | 0.04     |
| Thrombolytic use            | Ref                                   | 1.26 (0.84-1.88) | 1.26 (0.85-1.86) | 1.24 (0.83-1.87) | 0.62     |
| Major bleeding              | Ref                                   | 0.80 (0.63-1.01) | 0.81 (0.65-1.02) | 0.99 (0.78-1.25) | 0.09     |
| Hospital LOS (RR, 95% CI)   | Ref                                   | 1.01 (0.95-1.06) | 1.04 (0.98-1.09) | 1.05 (0.99-1.11) | 0.28     |
| Hospital costs (RR, 95% CI) | Ref                                   | 1.03 (0.97-1.10) | 1.02 (0.96-1.09) | 1.04 (0.97-1.11) | 0.69     |

*Right ventricular (RV) strain workup:* composite exposure consisting of use of trans-thoracic echo, cardiac troponin, or beta natriuretic peptide, *LOS* length of stay, *PE* pulmonary embolism

\* From hierarchical regression models accounting for demographics, comorbidities, acute organ failures, and hospital characteristics

**Table E9.** Outcomes associated with trans-thoracic echocardiogram use on hospital day 0 or day 1: hospital-level exposure and patient-level outcomes (N=64,299)

| Outcome                     | Hospital echocardiogram (day 0 or day 1) rate for pulmonary embolism |                  |                  |                  | p-value * |
|-----------------------------|----------------------------------------------------------------------|------------------|------------------|------------------|-----------|
|                             | Quartile 1                                                           | Quartile 2       | Quartile 3       | Quartile 4       |           |
|                             | 0-7%                                                                 | 7-12%            | 12-18%           | 18-45%           |           |
| Mortality (OR, 95% CI)      | Ref                                                                  | 1.19 (0.96-1.48) | 0.98 (0.79-1.22) | 1.12 (0.89-1.39) | 0.21      |
| ICU admission               | Ref                                                                  | 1.19 (0.99-1.55) | 1.24 (0.95-1.62) | 1.43 (1.09-1.87) | 0.07      |
| Thrombolytic use            | Ref                                                                  | 1.21 (0.81-1.81) | 1.49 (1.01-2.21) | 1.49 (1.00-2.23) | 0.15      |
| Major bleeding              | Ref                                                                  | 0.99 (0.79-1.25) | 0.95 (0.76-1.20) | 0.90 (0.71-1.14) | 0.79      |
| Hospital LOS (RR, 95% CI)   | Ref                                                                  | 1.04 (0.99-1.10) | 1.01 (0.95-1.06) | 1.00 (0.95-1.06) | 0.35      |
| Hospital costs (RR, 95% CI) | Ref                                                                  | 1.08 (1.02-1.15) | 1.06 (0.99-1.13) | 1.12 (1.05-1.19) | < 0.01    |

LOS length of stay. \* From hierarchical regression models accounting for demographics, comorbidities, acute organ failures, and hospital characteristics

**Table E10.** Outcomes associated with trans-thoracic echocardiogram use on hospital day 0 or day 1: patient-level exposure and patient-level outcomes (N=64,299)

| Outcome                    | Cohort mean       | Adjusted effect    |          |
|----------------------------|-------------------|--------------------|----------|
|                            |                   | estimate (95% CI)* | p-value  |
| Mortality                  | 2.0 %             | 0.95 (0.80-1.12)   | 0.51 †   |
| ICU admission              | 19.3 %            | 1.93 (1.80-2.07)   | < 0.01 † |
| Thrombolytic use           | 1.3 %             | 3.88 (3.30-4.57)   | < 0.01 † |
| Major bleeding             | 2.9 %             | 1.32 (1.17-1.51)   | < 0.01 ‡ |
| Hospital LOS (days)        | 5.4 ± 4.2         | 1.04 (1.02-1.05)   | < 0.01 § |
| Hospitalization cost (USD) | \$ 9,587 ± 10,298 | 1.18 (1.16-1.20)   | < 0.01   |

LOS length of stay USD U.S. dollars

\* Adjusted effect estimates: hazard ratio (mortality, ICU admission, thrombolytic use), odds ratio (major bleeding), relative proportion (hospital LOS, hospital costs)

† From Cox proportional hazard models with robust sandwich estimators

‡ From mixed effects logistic regression models

§ From mixed effects negative binomial regression model

|| From mixed effects linear regression model of log costs

**Table E11.** Association between trans-thoracic echocardiogram use on hospital day 0 or 1 and ICU admission on/after hospital day 2: hospital-level exposure and patient-level outcomes (N=64,299)

| Outcome                                                       | Hospital echocardiogram (day 0 or day 1) rate<br>for pulmonary embolism |                  |                  |                  | p-value* |
|---------------------------------------------------------------|-------------------------------------------------------------------------|------------------|------------------|------------------|----------|
|                                                               | Quartile 1                                                              | Quartile 2       | Quartile 3       | Quartile 4       |          |
|                                                               | 0-7%                                                                    | 7-12%            | 12-18%           | 18-45%           |          |
| ICU admission (OR, 95% CI),<br>hospital day 2 or later        | Ref                                                                     | 1.01 (0.79-1.30) | 0.90 (0.70-1.16) | 0.90 (0.70-1.18) | 0.69     |
| ICU <u>or</u> step-down admission,<br>hospital day 2 or later | Ref                                                                     | 1.06 (0.79-1.44) | 0.89 (0.66-1.21) | 0.86 (0.63-1.18) | 0.50     |

\* From hierarchical regression models accounting for demographics, comorbidities, acute organ failures, and hospital characteristics
